# Supplementary material for: Combined Effects of BEIIb and SSIIa Alleles on Amylose Contents, Starch Fine Structures and Physicochemical Properties of Indica Rice
Source: MDPI journal article supplement (doi:10.3390/foods12010119), 2022-12-26
Supplement: s1 [file s1]

# Combined effects of *BEIIb* and *SSIIa* alleles on amylose contents, starch fine structures and physicochemical properties of indica rice

Yaqi Hu <sup>1,2</sup>, Yanni Zhang<sup>1</sup>, Shouwu Yu<sup>3</sup>, Guofu Deng <sup>4</sup>, Gaoxing Dai <sup>4\*</sup>, Jinsong Bao <sup>1,2\*</sup>

<sup>1</sup>Institute of Nuclear Agricultural Sciences, College of Agriculture and Biotechnology, Zhejiang University, Zijingang Campus, Hangzhou, 310058, China

<sup>2</sup>Hainan Institute of Zhejiang University, Yazhou Bay Science and Technology City, Yazhou District, Sanya 572025, China

<sup>3</sup>Zhejiang Academy of Agricultural Sciences, No.198, Shiqiao Road Shangcheng District, Hangzhou, China.

<sup>4</sup>Rice Research Institute, Guangxi Academy of Agricultural Sciences, Nanning, China

\*Corresponding authors: [jsbao@zju.edu.cn](mailto:jsbao@zju.edu.cn) (J.B.); [25266220@qq.com](mailto:25266220@qq.com) (G.D.); Tel: +86-571-86971932 (J.B.)

Table S1. The primer sequences.

| Gene         | Forward primer (5' → 3') | Reverse primer (5' → 3') |
|--------------|--------------------------|--------------------------|
| <i>BEIIb</i> | TGCACCAAGTAGTCGTTTCGGG   | TGAGCAGAGGGAGTAATTAATGA  |
| <i>SSIla</i> | CGAGGCGCAGCACAACAG       | GGCCGTGCAGATCTTAACCAT    |
|              | CAAGGAGAGCTGGAGGGGGC     | ACATGCCGCGCACCTGGAAA     |
| <i>Wx</i>    | CTTTGTCTATCTCAAGACAC     | TTGCAGATGTTCTTCCTGATG    |

Table S2. Correlation coefficients between starch structural parameters and functional properties.

|             | $X_{AP1}$     | $X_{AP2}$ | $X_{AM}$ | $h_{AM}$ | $hap2/hap1$ | AC      | fa      | fb1     | fb2     | fb3     | $\bar{X}$ | RC      | 1045/1022 | 1022/995 | To     | Tp     | Tc      | $\Delta H$ | PV     | HPV | BD | CPV | SB |
|-------------|---------------|-----------|----------|----------|-------------|---------|---------|---------|---------|---------|-----------|---------|-----------|----------|--------|--------|---------|------------|--------|-----|----|-----|----|
| $X_{AP2}$   | <b>0.98**</b> |           |          |          |             |         |         |         |         |         |           |         |           |          |        |        |         |            |        |     |    |     |    |
| $X_{AM}$    | <b>0.92**</b> | 0.86**    |          |          |             |         |         |         |         |         |           |         |           |          |        |        |         |            |        |     |    |     |    |
| $h_{AM}$    | <b>0.92**</b> | 0.93**    | 0.91**   |          |             |         |         |         |         |         |           |         |           |          |        |        |         |            |        |     |    |     |    |
| $hap2/hap1$ | 0.95**        | 0.97**    | 0.88**   | 0.98**   |             |         |         |         |         |         |           |         |           |          |        |        |         |            |        |     |    |     |    |
| AC          | 0.94**        | 0.93**    | 0.94**   | 0.99**   | 0.97**      |         |         |         |         |         |           |         |           |          |        |        |         |            |        |     |    |     |    |
| fa          | -0.88**       | -0.89**   | -0.75**  | -0.73**  | -0.77**     | -0.77** |         |         |         |         |           |         |           |          |        |        |         |            |        |     |    |     |    |
| fb1         | -0.74**       | -0.76**   | -0.72**  | -0.87**  | -0.88**     | -0.83** | 0.41    |         |         |         |           |         |           |          |        |        |         |            |        |     |    |     |    |
| fb2         | 0.75**        | 0.84**    | 0.64*    | 0.81**   | 0.83**      | 0.77**  | -0.70*  | -0.64*  |         |         |           |         |           |          |        |        |         |            |        |     |    |     |    |
| fb3         | 0.96**        | 0.97**    | 0.88**   | 0.95**   | 0.98**      | 0.95**  | -0.83** | -0.85** | 0.76**  |         |           |         |           |          |        |        |         |            |        |     |    |     |    |
| $\bar{X}$   | 0.97**        | 0.98**    | 0.88**   | 0.95**   | 0.98**      | 0.95**  | -0.86** | -0.82** | 0.78**  | 1.00**  |           |         |           |          |        |        |         |            |        |     |    |     |    |
| RC          | -0.85**       | -0.86**   | -0.81**  | -0.94**  | -0.94**     | -0.91** | 0.62*   | 0.94**  | -0.72** | -0.94** | -0.92**   |         |           |          |        |        |         |            |        |     |    |     |    |
| 1045/1022   | 0.95**        | 0.91**    | 0.83**   | 0.78**   | 0.84**      | 0.81**  | -0.92** | -0.57   | 0.62*   | 0.89**  | 0.90**    | -0.72** |           |          |        |        |         |            |        |     |    |     |    |
| 1022/995    | -0.88**       | -0.92**   | -0.66*   | -0.78**  | -0.87**     | -0.76** | 0.87**  | 0.63*   | -0.85** | -0.87** | -0.90**   | 0.77**  | -0.87**   |          |        |        |         |            |        |     |    |     |    |
| To          | 0.83**        | 0.82**    | 0.64*    | 0.60*    | 0.68*       | 0.64*   | -0.94** | -0.30   | 0.55    | 0.73**  | 0.77**    | -0.48   | 0.92**    | -0.81**  |        |        |         |            |        |     |    |     |    |
| Tp          | 0.92**        | 0.92**    | 0.75**   | 0.75**   | 0.81**      | 0.78**  | -0.97** | -0.48   | 0.68*   | 0.86**  | 0.88**    | -0.65*  | 0.96**    | -0.89**  | 0.98** |        |         |            |        |     |    |     |    |
| Tc          | 0.96**        | 0.96**    | 0.82**   | 0.84**   | 0.89**      | 0.86**  | -0.94** | -0.64*  | 0.69*   | 0.94**  | 0.95**    | -0.78** | 0.97**    | -0.90**  | 0.92** | 0.98** |         |            |        |     |    |     |    |
| $\Delta H$  | 0.11          | 0.07      | -0.09    | -0.22    | -0.10       | -0.17   | -0.31   | 0.29    | -0.23   | 0.03    | 0.05      | 0.18    | 0.36      | -0.18    | 0.51   | 0.36   | 0.28    |            |        |     |    |     |    |
| PV          | -0.84**       | -0.79**   | -0.94**  | -0.91**  | -0.87**     | -0.92** | 0.56    | 0.84**  | -0.57   | -0.85** | -0.83**   | 0.87**  | -0.70*    | 0.56     | -0.45  | -0.59* | -0.71*  | 0.19       |        |     |    |     |    |
| HPV         | -0.87**       | -0.80**   | -0.97**  | -0.86**  | -0.82**     | -0.90** | 0.70*   | 0.68*   | -0.50   | -0.84** | -0.83**   | 0.77**  | -0.80**   | 0.57     | -0.62* | -0.71* | -0.78** | -0.01      | 0.95** |     |    |     |    |

|     |         |         |         |         |         |         |        |        |         |         |         |        |         |        |         |         |         |       |        |        |        |        |        |
|-----|---------|---------|---------|---------|---------|---------|--------|--------|---------|---------|---------|--------|---------|--------|---------|---------|---------|-------|--------|--------|--------|--------|--------|
| BD  | -0.50   | -0.51   | -0.59*  | -0.73** | -0.69*  | -0.66*  | 0.10   | 0.91** | -0.52   | -0.61*  | -0.57   | 0.80** | -0.28   | 0.36   | 0.04    | -0.15   | -0.32   | 0.56  | 0.78** | 0.55   |        |        |        |
| CPV | -0.93** | -0.90** | -0.95** | -0.95** | -0.93** | -0.96** | 0.72** | 0.85** | -0.64*  | -0.95** | -0.93** | 0.92** | -0.83** | 0.71** | -0.63*  | -0.75** | -0.85** | 0.03  | 0.97** | 0.95** | 0.68*  |        |        |
| SB  | -0.92** | -0.93** | -0.78** | -0.82** | -0.87** | -0.84** | 0.89** | 0.68*  | -0.65*  | -0.94** | -0.95** | 0.82** | -0.91** | 0.88** | -0.84** | -0.91** | -0.96** | -0.30 | 0.70*  | 0.76** | 0.36   | 0.86** |        |
| CS  | -0.90** | -0.91** | -0.84** | -0.95** | -0.96** | -0.93** | 0.67*  | 0.94** | -0.72** | -1.00** | -0.95** | 1.00** | -0.78** | 0.80** | -0.57   | -0.72** | -0.84** | 0.07  | 0.89** | 0.81** | 0.76** | 0.95** | 0.88** |

---

\* and \*\* indicate significant at  $p < 0.05$  and  $0.01$  levels, respectively.
